## Correction

**Correction: Aspirin counteracts cancer stem cell features, desmoplasia and gemcitabine resistance in pancreatic cancer**

**Yiyao Zhang<sup>1,2,3,4</sup>, Li Liu<sup>1,2,3</sup>, Pei Fan<sup>1,2,3</sup>, Nathalie Bauer<sup>1,2,3</sup>, Jury Gladkikh<sup>1,2,3</sup>, Eduard Ryschich<sup>2,3</sup>, Alexandr V. Bazhin<sup>3</sup>, Nathalia A. Giese<sup>3</sup>, Oliver Strobel<sup>3</sup>, Thilo Hackert<sup>3</sup>, Ulf Hinz<sup>3</sup>, Wolfgang Gross<sup>1,2,3</sup>, Franco Fortunato<sup>2,3</sup> and Ingrid Herr<sup>1,2,3</sup>**

<sup>1</sup>Molecular OncoSurgery, University of Heidelberg and German Cancer Research Center (DKFZ), Heidelberg, Germany

<sup>2</sup>Section Surgical Research, University of Heidelberg, Heidelberg, Germany

<sup>3</sup>Department of General, Visceral and Transplantation Surgery, University of Heidelberg, Heidelberg, Germany

<sup>4</sup>Gastrointestinal Surgery, Zhongshan Hospital of Xiamen University, Xiamen, China

**Published:** July 17, 2024

**Copyright:** © 2024 Zhang et al. This is an open access article distributed under the terms of the [Creative Commons Attribution License](#) (CC BY 4.0), which permits unrestricted use, distribution, and reproduction in any medium, provided the original author and source are credited.

**This article has been corrected:** In Figure 7, images for the control groups were accidentally inserted into the ASA, GEM, and A+G rows, instead of those from the treatment groups. In addition, in Supplementary Figure 3, panel T22, the images for samples act. Casp3 and c-Met are accidental duplicates. The corrected Figure 7 and Supplementary Figure 3, produced using the original data, are shown below. The authors declare that these corrections do not change the results or conclusions of this paper.

Original article: Oncotarget. 2015; 6:9999–10015. <https://doi.org/10.18632/oncotarget.3171>

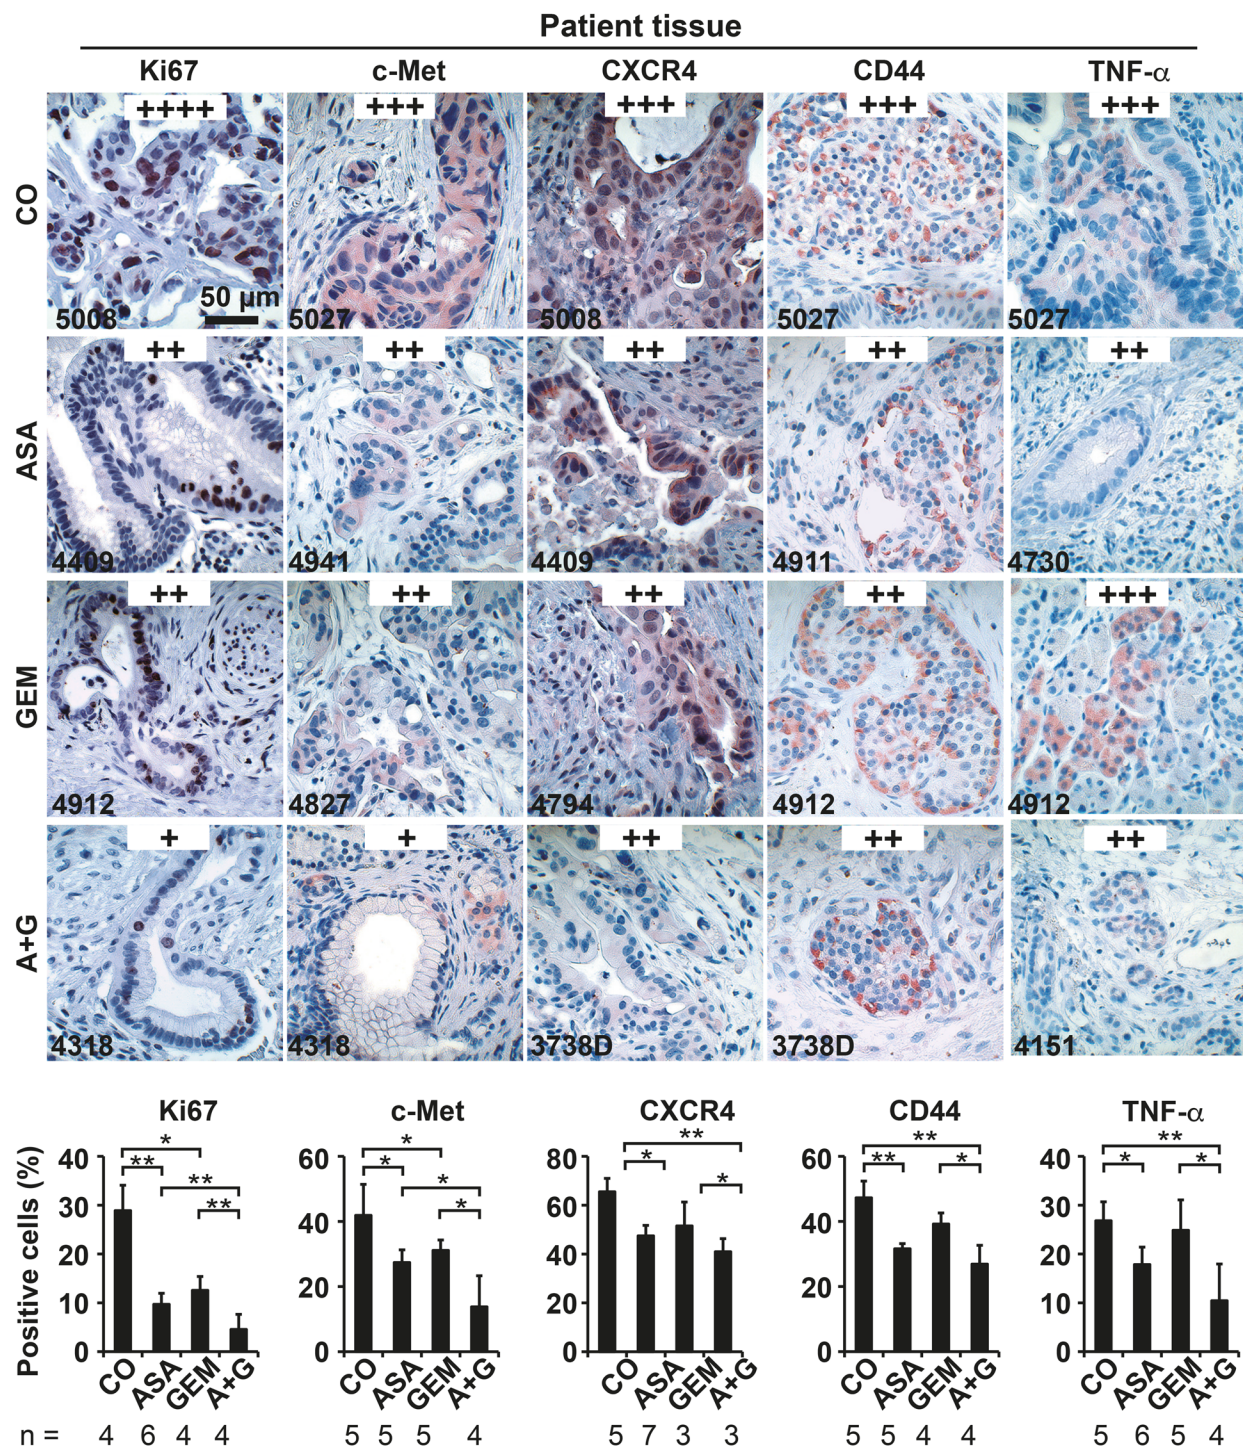

**Figure 7: Aspirin intake before surgery inhibits the expression of progression markers in PDA patient tissue.** Tumor tissue sections derived from patients with documented pre-operative administration of aspirin ( $n = 7$ ), gemcitabine ( $n = 5$ ), aspirin plus gemcitabine ( $n = 3$ ), or neither aspirin nor gemcitabine ( $n = 6$ ) were evaluated by immunohistochemistry for the expression of the proliferation marker Ki67, the inflammatory factor TNF- $\alpha$ , and the CSC markers c-Met, CD44 and CXCR4. The scale bar indicates 50  $\mu$ m. The number of positive cells was quantified in 10 visual fields at 400 $\times$  magnification, and the means  $\pm$  SD are shown in the diagrams. The data are presented as means  $\pm$  SD (\*\* $P < 0.01$ , \* $P < 0.05$ ).

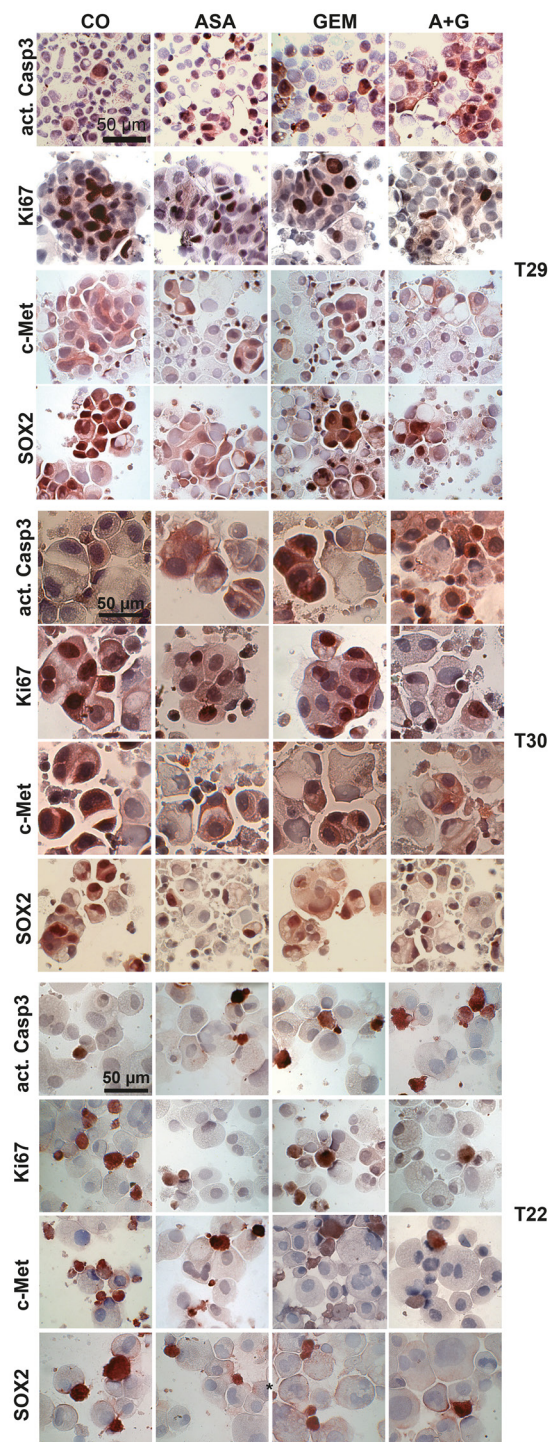

**Supplementary Figure 3: Aspirin inhibits the expression of progression markers in primary CSCs spheroids and enhances gemcitabine efficacy.** Immunohistochemical staining is shown for primary spheroids, which were obtained and treated as described in Figure 4.
